# Supplementary material for: Decision Making Algorithm for Adult Spinal Deformity Surgery
Source: PubMed Central journal article supplement — J Korean Neurosurg Soc. 2016 Jul 8;59(4):327–33. doi: 10.3340/jkns.2016.59.4.327 (PMC4954878; doi:10.3340/jkns.2016.59.4.327), 2016-07-08
Supplement: jkns-59-327-s003.pdf [file jkns-59-327-s003.pdf]

## Group 2: CTns / Lenke 4CN

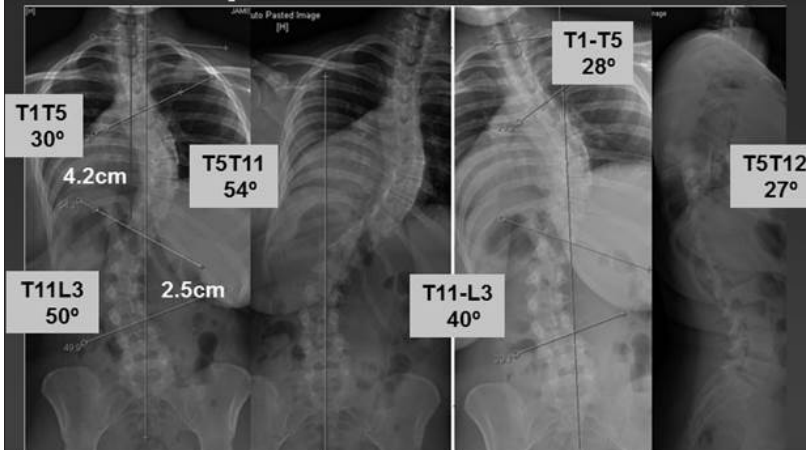

F/18, UIV=T3 with right shoulder higher but choose T3 due to the kyphosis at T4-5. T/L AVT=1.7, T/L AVR=2, T/L Cobb=1.2 but choose nonselective fusion because she does not want potential truncal shift

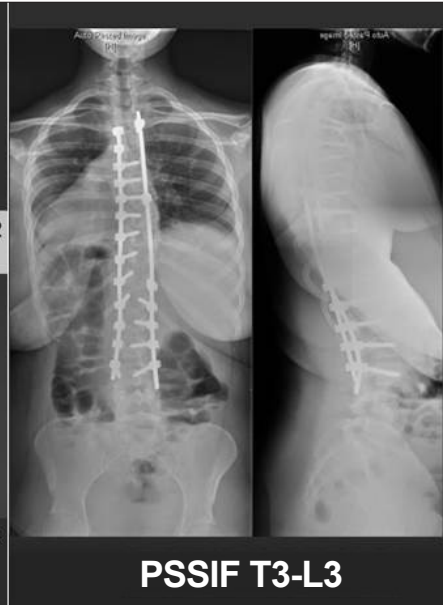

Case 3. 18 year-old-girl with Group 2NS.
