# Supplementary material for: Decision Making Algorithm for Adult Spinal Deformity Surgery
Source: PubMed Central journal article supplement — J Korean Neurosurg Soc. 2016 Jul 8;59(4):327–33. doi: 10.3340/jkns.2016.59.4.327 (PMC4954878; doi:10.3340/jkns.2016.59.4.327), 2016-07-08
Supplement: jkns-59-327-s006.pdf [file jkns-59-327-s006.pdf]

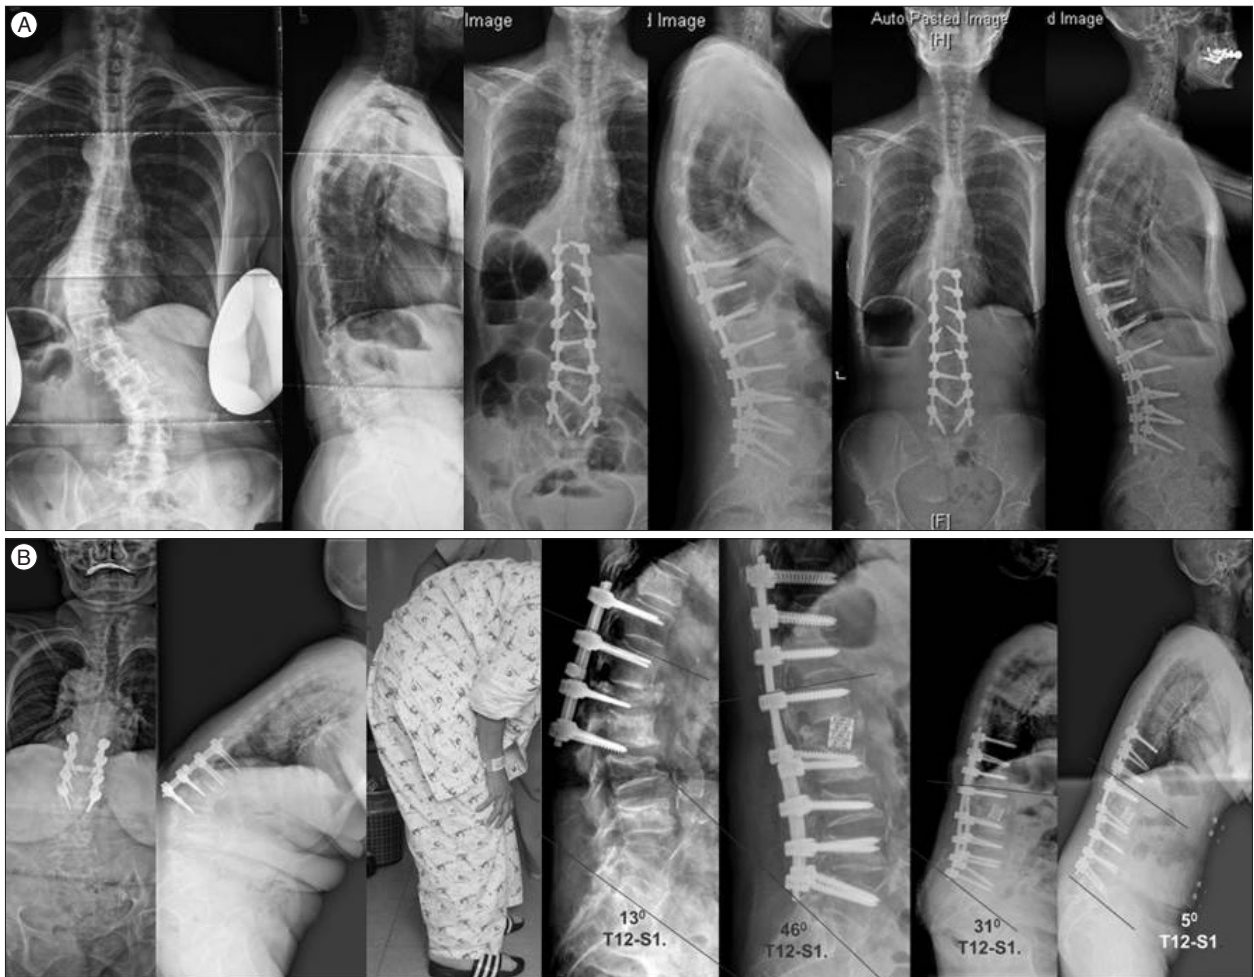

**Case 6.** A : A 66-year old female with degenerative lumbar scoliosis with good sagittal balance underwent posterior spinal fusion from T10 to L5. Her sagittal balance was tolerable and her disc at L5-S1 was well-preserved before surgery. Radiographic and clinical outcomes were excellent in 3 years post operation. B : An 82-year old female with sagittal imbalance and distal junctional failure underwent posterior vertebral column resection at L1 and spinal fusion from T9 to L5. Radiographic and clinical outcomes were poor even after the reconstructive surgery.
