# Supplementary material for: Decision Making Algorithm for Adult Spinal Deformity Surgery
Source: PubMed Central journal article supplement — J Korean Neurosurg Soc. 2016 Jul 8;59(4):327–33. doi: 10.3340/jkns.2016.59.4.327 (PMC4954878; doi:10.3340/jkns.2016.59.4.327), 2016-07-08
Supplement: jkns-59-327-s008.pdf [file jkns-59-327-s008.pdf]

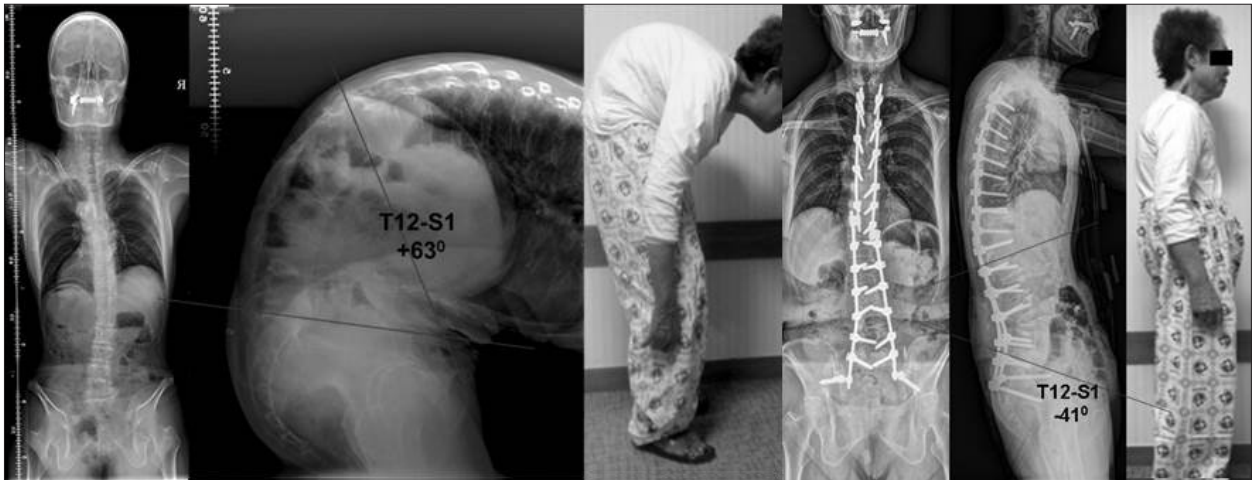

**Case 8.** A representative case requiring a pedicle subtraction osteotomy. A 71-year old female with degenerative thoracolumbar kyphosis underwent a pedicle subtraction osteotomy at L4 and 3-level Ponte osteotomies and spinal instrumentation/fusion from T3 to pelvis. Her sagittal balance was nicely restored after surgery. Radiographic and clinical outcomes were excellent in 3 years postoperative.
