# Supplementary material for: Decision Making Algorithm for Adult Spinal Deformity Surgery
Source: PubMed Central journal article supplement — J Korean Neurosurg Soc. 2016 Jul 8;59(4):327–33. doi: 10.3340/jkns.2016.59.4.327 (PMC4954878; doi:10.3340/jkns.2016.59.4.327), 2016-07-08
Supplement: jkns-59-327-s009.pdf [file jkns-59-327-s009.pdf]

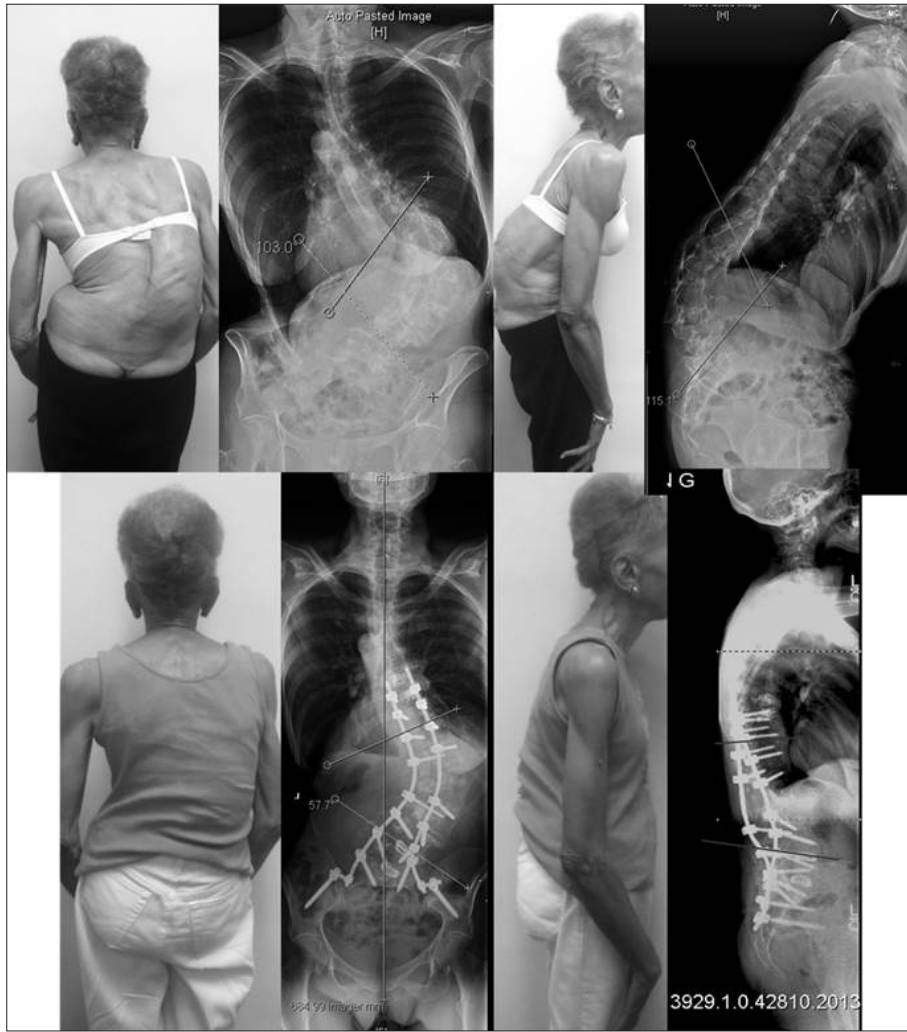

**Case 9.** A 70-year old female with degenerative thoracolumbar kyphoscoliosis underwent a posterior vertebral column resection at the apex of the curve and spinal instrumentation/fusion from T9 to pelvis with prophylactic vertebroplasty. Her sagittal/coronal balance was nicely corrected after surgery. Radiographical and clinical outcomes were excellent in 2 years postoperative.
