# Supplementary figures and images for: Decision Making Algorithm for Adult Spinal Deformity Surgery
Source: PubMed Central journal article supplement — J Korean Neurosurg Soc. 2016 Jul 8;59(4):327–33. doi: 10.3340/jkns.2016.59.4.327 (PMC4954878; doi:10.3340/jkns.2016.59.4.327), 2016-07-08

## Group 1: Lenke 2AN

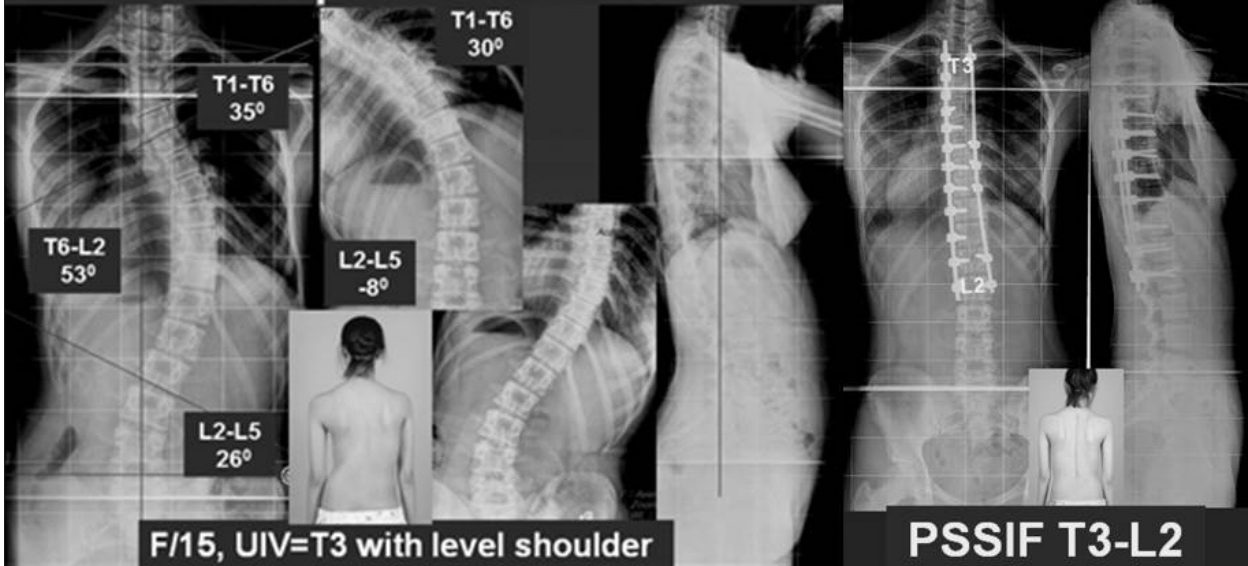

Case 1. 15 year-old-girl with Group 1.

Supplement: jkns-59-327-s001.pdf [file jkns-59-327-s001.pdf]

## Group 2S: CTs / Lenke 3CN

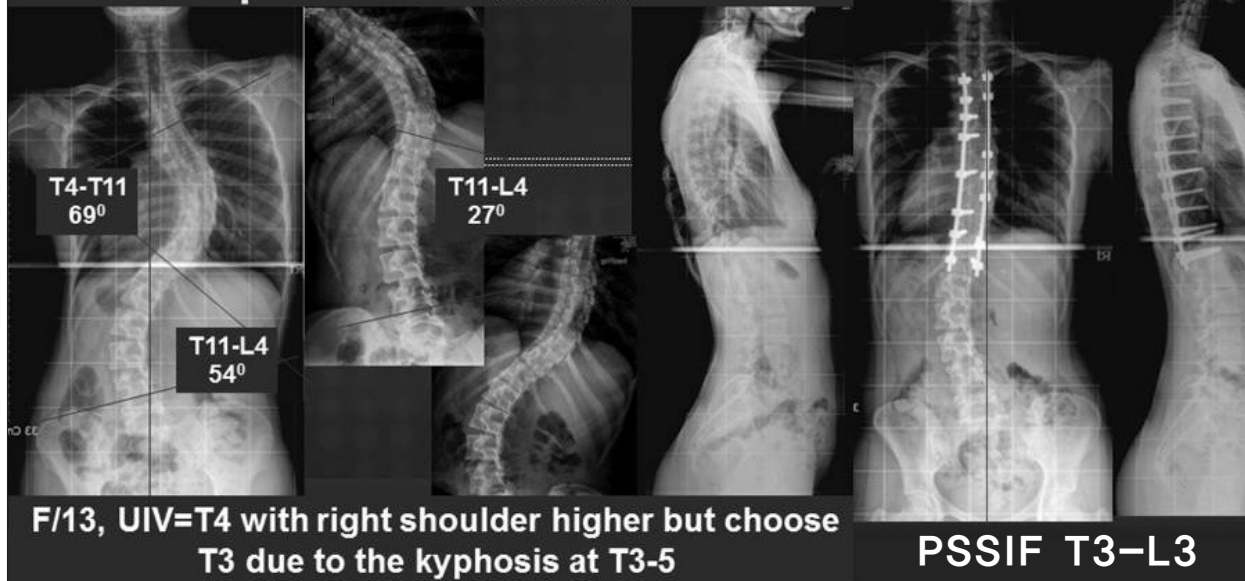

Case 2. 13 year-old-girl with Group 2S.

Supplement: jkns-59-327-s002.pdf [file jkns-59-327-s002.pdf]

## Group 3S: CLs / Lenke 5CN

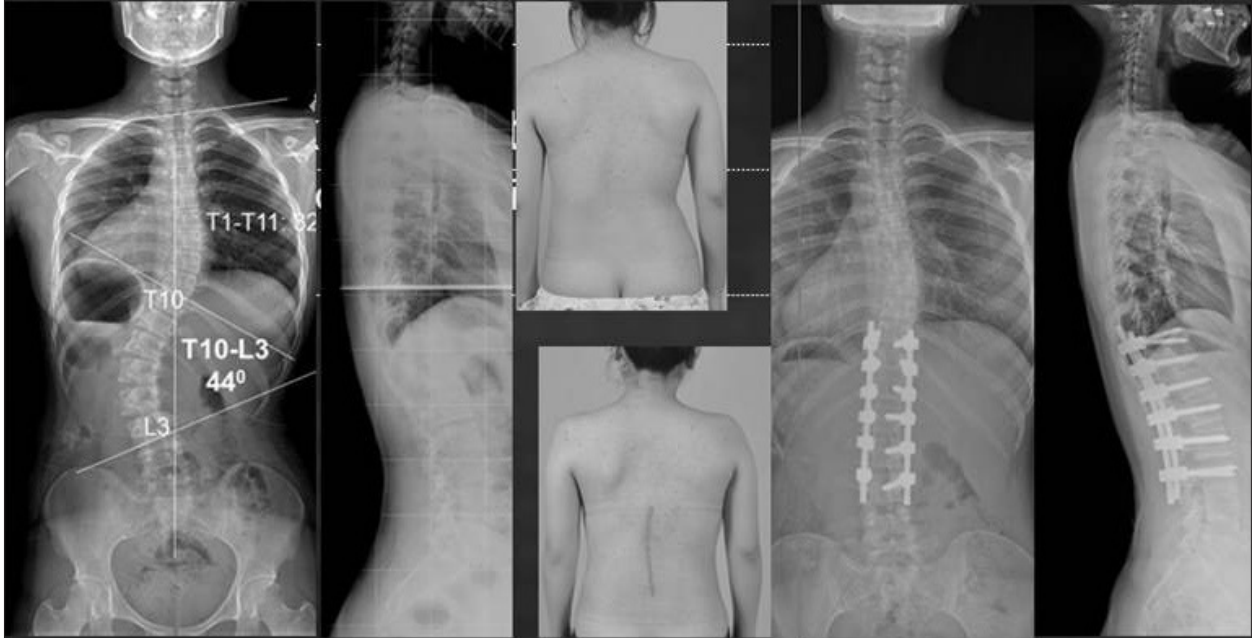

**F/15, right shoulder slightly higher**

**PSSIF T10-L3**

**Case 4.** 15 year-old-girl with Group 3S.

Supplement: jkns-59-327-s004.pdf [file jkns-59-327-s004.pdf]
